# Supplementary material for: Evaluation of Solar-Driven Photocatalytic Activity of Thermal Treated TiO2 under Various Atmospheres
Source: MDPI journal article supplement (doi:10.3390/nano9020163), 2019-01-29

# Evaluation of Solar-Driven Photocatalytic Activity of Thermal Treated TiO<sub>2</sub> under Various Atmospheres

Reza Katal <sup>1</sup>, Saeideh Kholghi Eshkalak <sup>2</sup>, Saeid Masudy-panah <sup>3</sup>, Mohammadreza Kosari <sup>4</sup>, Mohsen Saeedikhani <sup>5</sup>, Mehrdad Zarinejad <sup>6,\*</sup> and Seeram Ramakrishna <sup>2,\*</sup>

<sup>1</sup> Department of Civil & Environmental Engineering, National University of Singapore, Singapore 117576, Singapore; reza.katal@u.nus.edu

<sup>2</sup> Department of Mechanical Engineering, Center for Nanofibers and Nanotechnology, National University of Singapore, Singapore 117575, Singapore; s.kholghi143@gmail.com

<sup>3</sup> Department of Electrical and Computer Engineering, National University of Singapore, Singapore 119260, Singapore; saeid1@e.ntu.edu.sg

<sup>4</sup> Department of Chemical and Biomolecular Engineering, Faculty of Engineering, National University of Singapore 119260, Singapore; kosari@u.nus.edu

<sup>5</sup> Department of Materials Science and Engineering, National University of Singapore, Singapore 117583, Singapore; saeedikhani@u.nus.edu

<sup>6</sup> Singapore Institute of Manufacturing Technology (SIMTech), A\*STAR (Agency for Science, Technology and Research), Singapore 138634, Singapore

\* Correspondence: mehrdad@simtech.a-star.edu.sg (M.Z.); seeram@nus.edu.sg (S.R.); Tel.: +65-6516-4805 (S.R)

**Table S1.** The surface area of samples.

| Samples | Surface area (m <sup>2</sup> /g) |
|---------|----------------------------------|
| P25     | 50.1                             |
| A-400   | 38.2                             |
| V-400   | 37.9                             |
| H-400   | 37.8                             |

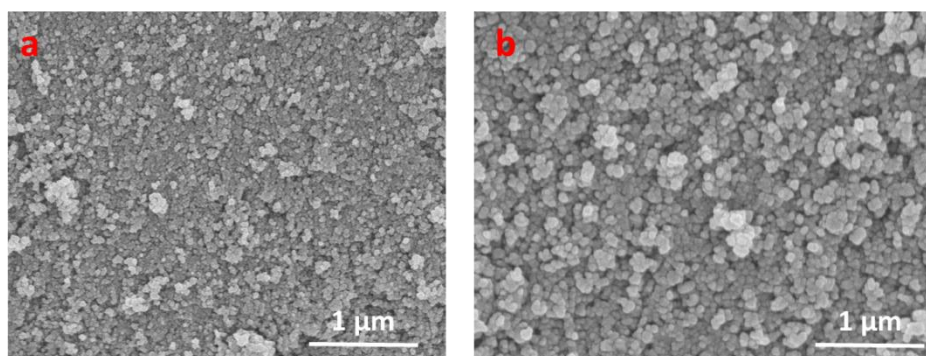

**Figure S1.** The SEM images of (a) P25 and (b) H-400.

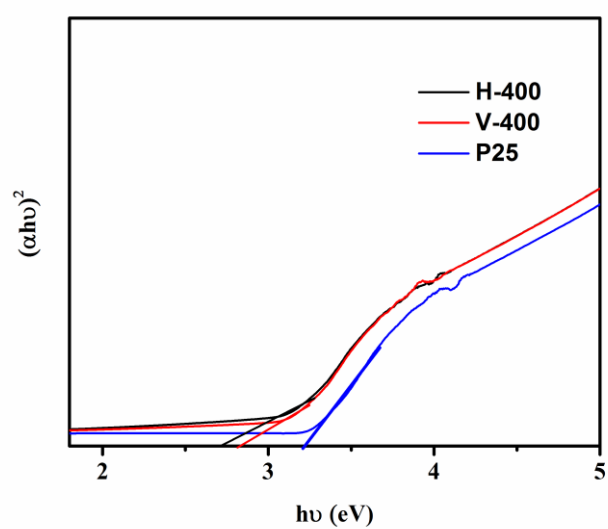

**Figure S2.** Plot of  $(\alpha h\nu)^2$  versus  $h\nu$  for H-400, V-400 and P25.

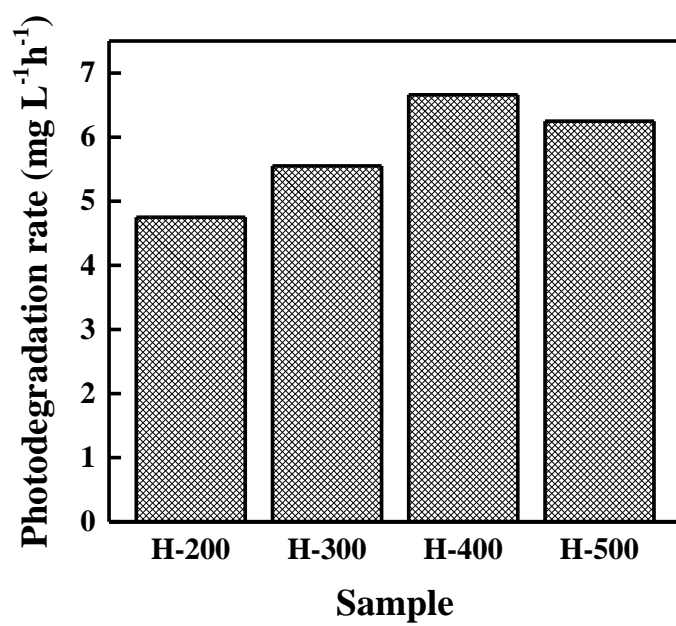

**Figure S3.** The photocatalytic degradation rate of hydrogenated samples under 1.5 G solar light illumination.

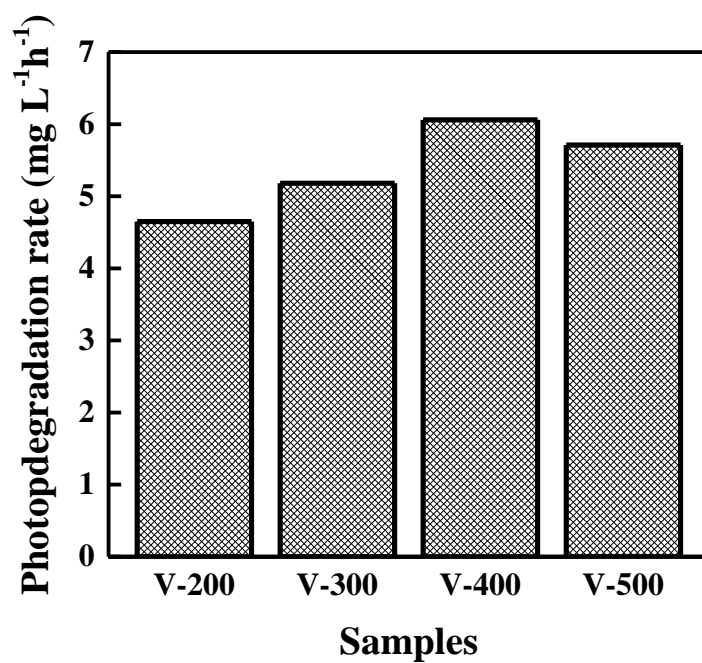

**Figure S4.** The photocatalytic degradation rate of calcined samples under vacuum under 1.5 G solar light illumination.

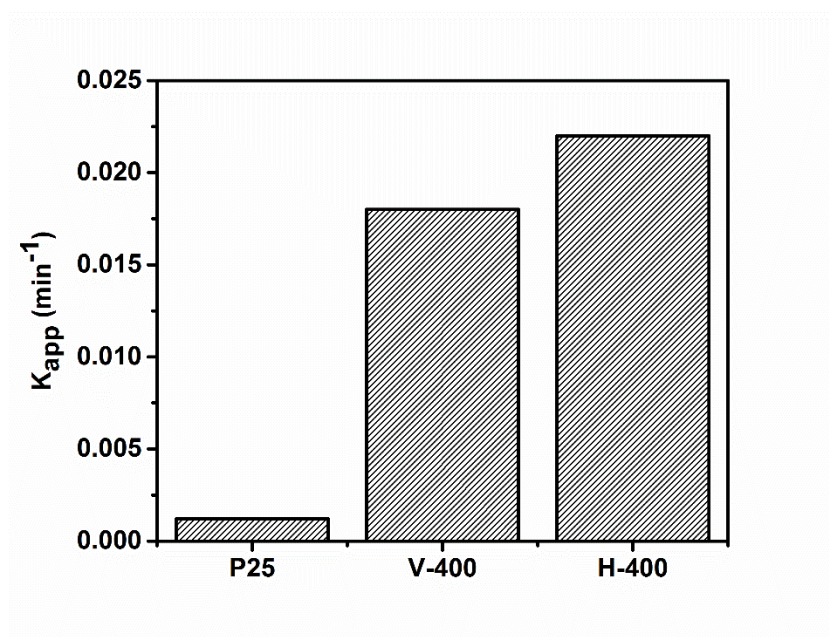

**Figure S5.**  $K_{app}$  (min<sup>-1</sup>) of the samples under visible light irradiation.

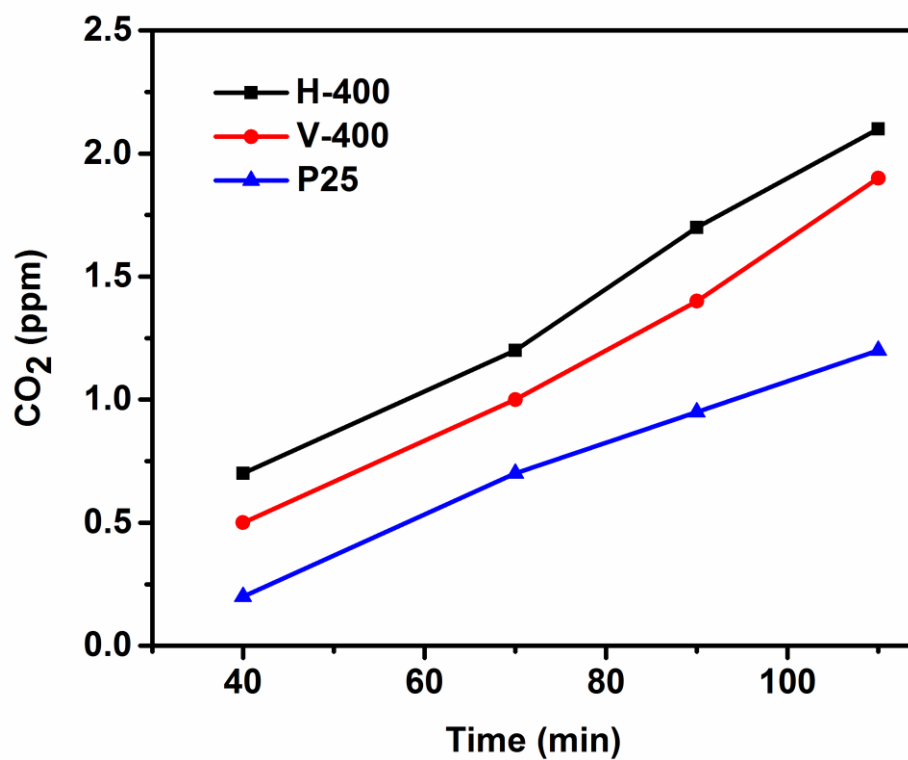

Figure S6. CO<sub>2</sub> production during the photocatalytic degradation of MB.

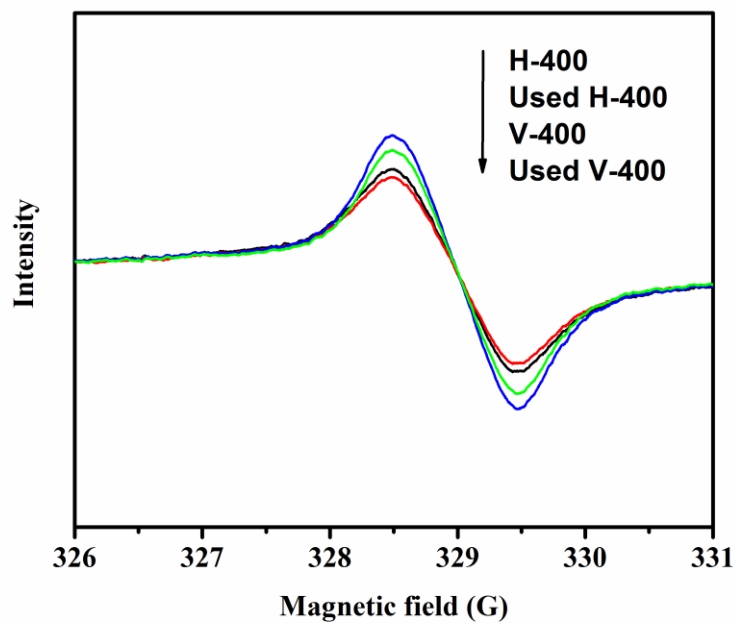

Figure S7. EPR spectra recorded at room temperature for fresh and used samples.

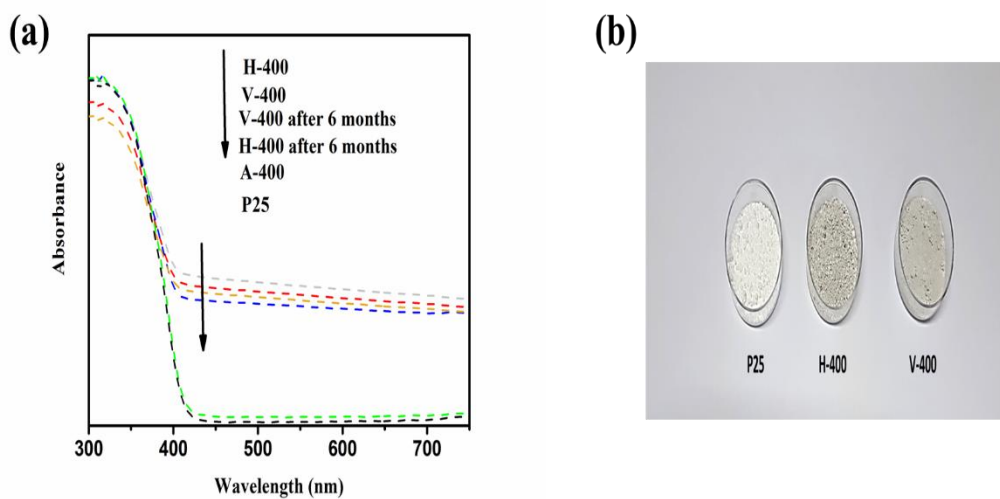

Supplement: s1 [file s1]
